# Supplementary material
Source: PubMed Central journal article supplement (PMC4691686)
Supplement: supp_WNL.0000000000002217_Supplemental_data.pdf [file supp_WNL.0000000000002217_Supplemental_data.pdf]

## Supplemental Methods e-1.

### *Predicted methylation:*

The predicted methylation model used here is taken from a prior publication and derived from a large cohort of FSHD1 (n=186) and healthy controls (n=254).<sup>9</sup> A linear mixed effects model was used to determine the relationship between log transformed CpG methylation (chromosomes 4q and 10q) and repeat array sizes, with a random effect per family. The predicted methylation for FSHD1 individuals can be calculated by the formula: [intercept + F1 X  $\log_2(4S)$  + F2 X  $\log_2(4L)$  + F3 X  $\log_2(10S)$  + F4 X  $\log_2(10L)$  + gender].<sup>9</sup> 4S = chromosome 4 D4Z4 region short allele; 4L = chromosome 4 D4Z4 region long allele; 10S = chromosome 10 D4Z4 region short allele; 10L = chromosome 10 D4Z4 region long allele.

### *Quantitative myometry:*

Measurement of maximum voluntary isometric contraction (kg-force) was done with a digital force gauge (the QMA system, Gainesville, GA). Testing required that the joint at which the movement occurs is placed in a 90° position and the force transducer is attached perpendicular to the joint at a 90° angle with the help of an adjustable cuff and inelastic strap attached to a metal frame. Knee extension was tested twice for 3-5 seconds while the patient was coached vigorously. Predicted values for knee extensor strength were derived from a large normative database adjusting for gender, age, and height as previously described.<sup>e2</sup> Percent predicted of normal = 100 X (predicted strength-observed strength)/predicted strength.

**Supplemental Table e-1. Clinical Severity Score description of scoring.**<sup>e1</sup>

| Score | Description                                                                                                                                                                         |
|-------|-------------------------------------------------------------------------------------------------------------------------------------------------------------------------------------|
| 0.5   | Facial weakness                                                                                                                                                                     |
| 1     | Mild scapular involvement without limitation of arm abduction; no awareness of disease symptoms is possible                                                                         |
| 1.5   | Moderate involvement of scapular and arm muscles or both (arm abduction >60° and strength ≥3 in arm muscles); no involvement of pelvic and leg muscles                              |
| 2     | Severe scapular involvement (arm abduction < 60° on at least one side); strength < 3 in at least one muscular district of the arms; no involvement of pelvic and leg muscles.       |
| 2.5   | Tibioperoneal weakness; no weakness of pelvic and proximal leg muscles                                                                                                              |
| 3     | Mild weakness of pelvic and proximal leg muscles or both (strength ≥4 in all these muscles); able to stand up from a chair without support                                          |
| 3.5   | Moderate weakness of pelvic and proximal leg muscles or both (strength ≥3 in all these muscles); able to stand up from a chair with monolateral support                             |
| 4     | Severe weakness of pelvic and proximal leg muscles or both (strength < 3 in at least one of these muscles); able to stand up from a chair with double support; able to walk unaided |
| 4.5   | Unable to stand up from a chair; walking limited to several steps with support; may use wheelchair for most activities                                                              |
| 5     | Wheelchair bound                                                                                                                                                                    |

## Supplemental e-References

- e1. Ricci E, Galluzzi G, Deidda G, et al. Progress in the molecular diagnosis of facioscapulohumeral muscular dystrophy and correlation between the number of KpnI repeats at the 4q35 locus and clinical phenotype. *Ann Neurol* 1999;45:751-757.
- e2. FSH-DY. A prospective, quantitative study of the natural history of facioscapulohumeral muscular dystrophy (FSHD): implications for therapeutic trials. The FSH-DY Group. *Neurology* 1997;48:38-46.
- e3. Statland JM, Shah B, Henderson D, van der Maarel S, Tapscott SJ, Tawil R. Muscle pathology grade for facioscapulohumeral muscular dystrophy biopsies. *Muscle Nerve* 2015.
- e4. Ricci G, Scionti I, Sera F, et al. Large scale genotype-phenotype analyses indicate that novel prognostic tools are required for families with facioscapulohumeral muscular dystrophy. *Brain* 2013;136:3408-3417.
- e5. Statland JM, Tawil R. Risk of functional impairment in Facioscapulohumeral muscular dystrophy. *Muscle Nerve* 2014;49:520-527.
- e6. Miura K, Kumagai T, Matsumoto A, et al. Two cases of chromosome 4q35-linked early onset facioscapulohumeral muscular dystrophy with mental retardation and epilepsy. *Neuropediatrics* 1998;29:239-241.
- e7. Butz M, Koch MC, Muller-Felber W, Lemmers RJ, van der Maarel SM, Schreiber H. Facioscapulohumeral muscular dystrophy. Phenotype-genotype correlation in patients with borderline D4Z4 repeat numbers. *J Neurol* 2003;250:932-937.
- e8. Nakagawa M, Matsuzaki T, Higuchi I, et al. Facioscapulohumeral muscular dystrophy: clinical diversity and genetic abnormalities in Japanese patients. *Intern Med* 1997;36:333-339.

e9. Sacconi S, Lemmers RJ, Balog J, et al. The FSHD2 gene SMCHD1 is a modifier of disease severity in families affected by FSHD1. *Am J Hum Genet* 2013;93:744-751.
